# Supplementary material for: Genomic Analysis of a mcr-9.1-Harbouring IncHI2-ST1 Plasmid from Enterobacter ludwigii Isolated in Fish Farming
Source: MDPI journal article supplement (doi:10.3390/antibiotics11091232), 2022-09-10
Supplement: s1 [file s1]

**Table S2.** Results obtained from prediction of a bacteria's pathogenicity towards human hosts using PathogenFinder (<https://cge.cbs.dtu.dk/services/PathogenFinder/>). Results highlighted in green are those not matching protein pathogenic families.

| INSAq77 Contig  | NCBI Accession number | Description                                                                     | Protein Function                                                | NCBI Protein ID | Identity (%) |
|-----------------|-----------------------|---------------------------------------------------------------------------------|-----------------------------------------------------------------|-----------------|--------------|
| INSAq771p_94_1  | unknown               | <i>Salmonella enterica</i> subsp. <i>enterica</i> serovar Typhi str. CT18       | unknown                                                         | unknown         | 100.0        |
| INSAq771p_20_58 | CP000880              | <i>Salmonella enterica</i> subsp. <i>arizonae</i> serovar 62:z4,z23:--          | hypothetical protein                                            | ABX24195        | 97.07        |
| INSAq771p_43_25 | CU928158              | <i>Escherichia fergusonii</i> ATCC 35469 chromosome                             | inorganic polyphosphate/ATP-NAD kinase                          | CAQ88017        | 97.6         |
| INSAq771p_1_175 | AP006725              | <i>Klebsiella pneumoniae</i> NTUH-K2044 DNA                                     | 4-hydroxyphenylacetate 3-hydroxylase                            | BAH61578        | 98.08        |
| INSAq771p_3_58  | CP000964              | <i>Klebsiella pneumoniae</i> 342                                                | 4-hydroxybenzoate decarboxylase, subunit C                      | ACI07194        | 96.0         |
| INSAq771p_10_38 | CP000964              | <i>Klebsiella pneumoniae</i> 342                                                | ascorbate-specific permease IIC component                       | ACI07087        | 96.78        |
| INSAq771p_83_4  | CP000948              | <i>Escherichia coli</i> str. K12 substr. DH10B                                  | CP4-6 prophage; predicted sugar transporter                     | ACB01437        | 96.73        |
| INSAq771p_17_52 | CP000822              | <i>Citrobacter koseri</i> ATCC BAA-895                                          | hypothetical protein                                            | ABV14881        | 97.03        |
| INSAq771p_70_19 | CU928163              | <i>Escherichia coli</i> UMN026 chromosome                                       | putative pyridine nucleotide-disulfide oxidoreductase           | CAR11557        | 99.55        |
| INSAq771p_46_7  | DQ517526              | <i>Escherichia coli</i> APEC O1 plasmid pAPEC-O1-R                              | putative DNA methyltransferase                                  | ABF67893        | 97.84        |
| INSAq771p_4_46  | CP000822              | <i>Citrobacter koseri</i> ATCC BAA-895                                          | hypothetical protein                                            | ABV15790        | 98.73        |
| INSAq771p_91_11 | CP000650              | <i>Klebsiella pneumoniae</i> subsp. <i>pneumoniae</i> MGH 78578 plasmid pKPN5   | plasmid partition protein A                                     | ABR80603        | 99.5         |
| INSAq771p_10_82 | CP000822              | <i>Citrobacter koseri</i> ATCC BAA-895                                          | hypothetical protein                                            | ABV14677        | 95.78        |
| INSAq771p_5_104 | CP001138              | <i>Salmonella enterica</i> subsp. <i>enterica</i> serovar Agona str. SL483      | secretion protein HlyD family protein                           | ACH51271        | 95.77        |
| INSAq771p_46_27 | DQ517526              | <i>Escherichia coli</i> APEC O1 plasmid pAPEC-O1-R                              | RepH12                                                          | ABF67907        | 99.45        |
| INSAq771p_62_1  | AP010960              | <i>Escherichia coli</i> O111:H- str. 11128 DNA                                  | hypothetical protein                                            | BAI35195        | 98.86        |
| INSAq771p_8_15  | CP000648              | <i>Klebsiella pneumoniae</i> subsp. <i>pneumoniae</i> MGH 78578 plasmid pKPN3   | Hypothetical protein                                            | ABR80369        | 97.75        |
| INSAq771p_25_17 | CP001063              | <i>Shigella boydii</i> CDC 3083-94                                              | DNA replication and repair protein RecF                         | ACD08678        | 96.36        |
| INSAq771p_2_73  | CP000468              | <i>Escherichia coli</i> APEC O1                                                 | UDP-galactose-4-epimerase                                       | ABJ00142        | 96.45        |
| INSAq771p_107_4 | AE014073              | <i>Shigella flexneri</i> 2a str. 2457T                                          | IS911 orfA                                                      | AAP15762        | 96.31        |
| INSAq771p_61_7  | CP000886              | <i>Salmonella enterica</i> subsp. <i>enterica</i> serovar Paratyphi B str. SPB7 | hypothetical protein                                            | ABX66384        | 96.32        |
| INSAq771p_22_45 | CP001138              | <i>Salmonella enterica</i> subsp. <i>enterica</i> serovar Agona str. SL483      | phage integrase                                                 | ACH51627        | 97.36        |
| INSAq771p_93_6  | AE017042              | <i>Yersinia pestis</i> biovar Microtus str. 91001                               | transposase for insertion sequence IS100                        | AAS60313        | 100.0        |
| INSAq771p_7_29  | CP000243              | <i>Escherichia coli</i> UTI89                                                   | acetyl-coenzyme A carboxylase carboxyl transferase subunit beta | ABE08068        | 98.01        |
| INSAq771p_91_12 | CP000966              | <i>Klebsiella pneumoniae</i> 342 plasmid pKP91                                  | plasmid partition parB protein                                  | ACI12297        | 99.38        |
| INSAq771p_15_32 | CP000243              | <i>Escherichia coli</i> UTI89                                                   | 30S ribosomal protein S2                                        | ABE05693        | 97.93        |
| INSAq771p_193_1 | CP001383              | <i>Shigella flexneri</i> 2002017                                                | ISEhe3, transposase orfB                                        | ADA76515        | 99.02        |

|                  |          |                                                                                                         |                                                                 |          |       |
|------------------|----------|---------------------------------------------------------------------------------------------------------|-----------------------------------------------------------------|----------|-------|
| INSAq771p_91_9   | CP000650 | <i>Klebsiella pneumoniae</i> subsp. <i>pneumoniae</i> MGH 78578 plasmid pKPN5                           | DNA replication                                                 | ABR80601 | 99.31 |
| INSAq771p_6_5    | CP000266 | <i>Shigella flexneri</i> 5 str. 8401                                                                    | conserved hypothetical protein                                  | ABF06037 | 95.75 |
| INSAq771p_34_40  | CP000822 | <i>Citrobacter koseri</i> ATCC BAA-895                                                                  | hypothetical protein                                            | ABV12545 | 98.0  |
| INSAq771p_1_132  | CP000822 | <i>Citrobacter koseri</i> ATCC BAA-895                                                                  | hypothetical protein                                            | ABV14493 | 97.3  |
| INSAq771p_93_7   | CP000244 | <i>Escherichia coli</i> UTI89 plasmid pUTI89                                                            | putative transposase                                            | ABE10617 | 100.0 |
| INSAq771p_14_9   | CP000822 | <i>Citrobacter koseri</i> ATCC BAA-895                                                                  | hypothetical protein                                            | ABV15586 | 98.07 |
| INSAq771p_62_3   | CP001164 | <i>Escherichia coli</i> O157:H7 str. EC4115                                                             | conserved hypothetical protein                                  | ACI36787 | 99.22 |
| INSAq771p_2_77   | CP000880 | <i>Salmonella enterica</i> subsp. <i>arizonae</i> serovar 62:z4,z23:--                                  | hypothetical protein                                            | ABX22051 | 96.8  |
| INSAq771p_83_6   | U00096   | <i>Escherichia coli</i> str. K-12 substr. MG1655                                                        | CP4-6 prophage; predicted DNA-binding transcriptional regulator | AAC73375 | 95.63 |
| INSAq771p_18_19  | CP001113 | <i>Salmonella enterica</i> subsp. <i>enterica</i> serovar Newport str. SL254                            | ribonuclease III                                                | ACF61892 | 95.82 |
| INSAq771p_13_34  | CP000822 | <i>Citrobacter koseri</i> ATCC BAA-895                                                                  | hypothetical protein                                            | ABV13829 | 98.55 |
| INSAq771p_62_9   | DQ517526 | <i>Escherichia coli</i> APEC O1 plasmid pAPEC-O1-R                                                      | TerY1                                                           | ABF67743 | 99.06 |
| INSAq77_MCR-9_38 | CP001125 | <i>Salmonella enterica</i> subsp. <i>enterica</i> serovar Schwarzengrund str. CVM19633 plasmid pCVM1963 | 10, complete sequence.                                          | ACF88522 | 100.0 |
| INSAq771p_113_4  | AP006725 | <i>Klebsiella pneumoniae</i> NTUH-K2044 DNA                                                             | fimbrial chaperone protein mrkB precursor                       | BAH65060 | 100.0 |
| INSAq771p_10_14  | CP000247 | <i>Escherichia coli</i> 536                                                                             | oligoribonuclease                                               | ABG72350 | 96.13 |
| INSAq771p_10_41  | CP000964 | <i>Klebsiella pneumoniae</i> 342                                                                        | 3-dehydro-L-gulonate-6-phosphate decarboxylase                  | ACI10848 | 96.76 |
| INSAq771p_4_93   | CP000783 | <i>Enterobacter sakazakii</i> ATCC BAA-894                                                              | hypothetical protein                                            | ABU79530 | 98.27 |
| INSAq771p_62_10  | DQ517526 | <i>Escherichia coli</i> APEC O1 plasmid pAPEC-O1-R                                                      | TerX                                                            | ABF67742 | 100.0 |
| INSAq771p_18_13  | CP000243 | <i>Escherichia coli</i> UTI89                                                                           | RNA polymerase sigma E                                          | ABE08355 | 98.95 |
| INSAq771p_162_1  | CP001063 | <i>Shigella boydii</i> CDC 3083-94                                                                      | IS1 protein InsB                                                | ACD09517 | 97.1  |
| INSAq771p_15_21  | CP000822 | <i>Citrobacter koseri</i> ATCC BAA-895                                                                  | hypothetical protein                                            | ABV14271 | 97.35 |
| INSAq771p_3_23   | CP001144 | <i>Salmonella enterica</i> subsp. <i>enterica</i> serovar Dublin str. C                                 | 2021853, complete genome.                                       | ACH75166 | 97.86 |
| INSAq771p_5_36   | CP001063 | <i>Shigella boydii</i> CDC 3083-94                                                                      | conserved hypothetical protein                                  | ACD09359 | 98.33 |
| INSAq771p_9_48   | CP000034 | <i>Shigella dysenteriae</i> Sd197                                                                       | conserved hypothetical protein                                  | ABB62686 | 96.45 |
| INSAq771p_30_6   | CP000243 | <i>Escherichia coli</i> UTI89                                                                           | 50S ribosomal subunit protein L13                               | ABE09105 | 97.89 |
| INSAq771p_54_12  | XXX      | <i>Salmonella enterica</i> subsp. <i>enterica</i> serovar Typhi str. CT18                               | XXX                                                             |          | 98.16 |
| INSAq771p_31_45  | CP000783 | <i>Enterobacter sakazakii</i> ATCC BAA-894                                                              | hypothetical protein                                            | ABU79120 | 96.88 |
| INSAq771p_6_20   | AP006725 | <i>Klebsiella pneumoniae</i> NTUH-K2044 DNA                                                             | transcriptional repressor for methionine biosynthesis           | BAH61007 | 98.1  |
| INSAq771p_81_8   | CP000857 | <i>Salmonella enterica</i> subsp. <i>enterica</i> serovar Paratyphi C strain RKS4594                    | co-chaperonin GroES                                             | ACN48531 | 96.91 |
| INSAq771p_62_7   | DQ517526 | <i>Escherichia coli</i> APEC O1 plasmid pAPEC-O1-R                                                      | TerW                                                            | ABF67744 | 100.0 |

|                  |          |                                                                                      |                                                                                     |          |       |
|------------------|----------|--------------------------------------------------------------------------------------|-------------------------------------------------------------------------------------|----------|-------|
| INSAq771p_26_25  | CP000948 | <i>Escherichia coli</i> str. K12 substr. DH10B                                       | CP4-6 prophage; inner membrane lipoprotein                                          | ACB01418 | 100.0 |
| INSAq771p_19_15  | CP000247 | <i>Escherichia coli</i> 536                                                          | thioredoxin 1                                                                       | ABG71937 | 98.17 |
| INSAq771p_160_3  | CP000244 | <i>Escherichia coli</i> UTI89 plasmid pUTI89                                         | hypothetical protein                                                                | ABE10614 | 97.76 |
| INSAq771p_119_5  | CP000784 | <i>Enterobacter sakazakii</i> ATCC BAA-894 plasmid pESA2                             | hypothetical protein                                                                | ABU79601 | 100.0 |
| INSAq771p_92_4   | CP000036 | <i>Shigella boydii</i> Sb227                                                         | putative alpha helix protein                                                        | ABB65503 | 95.5  |
| INSAq771p_29_45  | AE017220 | <i>Salmonella enterica</i> subsp. <i>enterica</i> serovar Choleraesuis str. SC-B67   | chemotaxis regulator, transmits chemoreceptor signals to flagellar motor components | AAX65829 | 95.35 |
| INSAq771p_70_17  | CP001063 | <i>Shigella boydii</i> CDC 3083-94                                                   | IS1 transposase orfB                                                                | ACD09692 | 98.86 |
| INSAq771p_13_64  | CP000243 | <i>Escherichia coli</i> UTI89                                                        | hypothetical protein YajC                                                           | ABE05930 | 99.09 |
| INSAq771p_119_6  | CP000784 | <i>Enterobacter sakazakii</i> ATCC BAA-894 plasmid pESA2                             | hypothetical protein                                                                | ABU79600 | 100.0 |
| INSAq77_MCR-9_32 | CP000800 | <i>Escherichia coli</i> E24377A                                                      | IS66 family element, orf2                                                           | ABV19481 | 99.13 |
| INSAq771p_160_2  | CP001063 | <i>Shigella boydii</i> CDC 3083-94                                                   | IS66 family element, orf2                                                           | ACD10323 | 100.0 |
| INSAq771p_26_32  | CP000948 | <i>Escherichia coli</i> str. K12 substr. DH10B                                       | CP4-6 prophage; toxin of the Ykfl-YafW toxin-antitoxin system                       | ACB01411 | 99.12 |
| INSAq771p_32_43  | CP000880 | <i>Salmonella enterica</i> subsp. <i>arizonae</i> serovar 62:z4,z23:--               | hypothetical protein                                                                | ABX21688 | 97.44 |
| INSAq771p_10_39  | AE014075 | <i>Escherichia coli</i> CFT073                                                       | Unknown pentitol phosphotransferase enzyme II, B component                          | AAN83704 | 98.02 |
| INSAq771p_8_5    | CP000880 | <i>Salmonella enterica</i> subsp. <i>arizonae</i> serovar 62:z4,z23:--               | hypothetical protein                                                                | ABX21522 | 97.98 |
| INSAq771p_2_165  | AP006725 | <i>Klebsiella pneumoniae</i> NTUH-K2044 DNA                                          | cold shock protein                                                                  | BAH62358 | 100.0 |
| INSAq771p_131_1  | AE014073 | <i>Shigella flexneri</i> 2a str. 2457T                                               | IS1 orfB                                                                            | AAP15901 | 98.97 |
| INSAq771p_91_7   | CU928144 | <i>Escherichia fergusonii</i> str. ATCC 35469T plasmid pEFER                         | hypothetical protein                                                                | CAQ86970 | 98.82 |
| INSAq771p_6_137  | AP006725 | <i>Klebsiella pneumoniae</i> NTUH-K2044 DNA                                          | conserved hypothetical protein                                                      | BAH60940 | 95.51 |
| INSAq771p_70_18  | CP000800 | <i>Escherichia coli</i> E24377A                                                      | IS1, transposase orfA                                                               | ABV18481 | 100.0 |
| INSAq771p_66_21  | CP000799 | <i>Escherichia coli</i> E24377A plasmid pETE                                         | 4, complete sequence.                                                               | ABV16448 | 98.9  |
| INSAq771p_10_62  | CP000026 | <i>Salmonella enterica</i> subsp. <i>enterica</i> serovar Paratyphi A str. ATCC 9150 | conserved hypothetical protein                                                      | AAV79961 | 98.53 |
| INSAq771p_30_19  | CP000034 | <i>Shigella dysenteriae</i> Sd197                                                    | conserved hypothetical protein                                                      | ABB63408 | 97.01 |
| INSAq771p_134_1  | CP001113 | <i>Salmonella enterica</i> subsp. <i>enterica</i> serovar Newport str. SL254         | phage transcriptional regulator, AlpA                                               | ACF61557 | 96.51 |
| INSAq771p_26_24  | CP000948 | <i>Escherichia coli</i> str. K12 substr. DH10B                                       | CP4-57 prophage; predicted inner membrane protein                                   | ACB03777 | 97.44 |
| INSAq771p_22_56  | CP000026 | <i>Salmonella enterica</i> subsp. <i>enterica</i> serovar Paratyphi A str. ATCC 9150 | hypothetical protein                                                                | AAV78455 | 100.0 |
| INSAq771p_1_137  | AP006725 | <i>Klebsiella pneumoniae</i> NTUH-K2044 DNA                                          | putative amino acid/amine transport protein                                         | BAH61631 | 98.11 |
| INSAq771p_134_3  | BA000007 | <i>Escherichia coli</i> O157:H7 str. Sakai DNA                                       | hypothetical protein                                                                | BAB33724 | 97.26 |
| INSAq771p_73_3   | CP000783 | <i>Enterobacter sakazakii</i> ATCC BAA-894                                           | hypothetical protein                                                                | ABU79426 | 100.0 |
