# Supplementary material for: Genomic Analysis of a mcr-9.1-Harbouring IncHI2-ST1 Plasmid from Enterobacter ludwigii Isolated in Fish Farming
Source: MDPI journal article supplement (doi:10.3390/antibiotics11091232), 2022-09-10
Supplement: s1 [file s1]

Table S3. Demographic and genomic characteristics of the *E. ludwigii* isolates used for the phylogenomic analysis.

| Strain          | Collection Year | Location       | Isolation Source                           | Isolation type          | AMR genotypes <sup>1</sup>                                                                                                   | BioSample      | NCBI Accession Number | Contigs/Scaffolds | N50 (bp) | Length (bp) |
|-----------------|-----------------|----------------|--------------------------------------------|-------------------------|------------------------------------------------------------------------------------------------------------------------------|----------------|-----------------------|-------------------|----------|-------------|
| JP6             | 2011            | China          | rhizosphere soil                           | environmental/<br>other | <i>bla</i> <sub>ACT</sub> , <i>catA</i> *, <i>fosA</i> , <i>oqx</i> <i>B</i>                                                 | SAMN11415570   | NZ_CP040256           | 1                 | 4681598  | 4681598     |
| JP9             | 2011            | China          | soil                                       | environmental/<br>other | <i>bla</i> <sub>ACT</sub> , <i>catA</i> *, <i>fosA</i> , <i>oqx</i> <i>B</i>                                                 | SAMN11415807   | NZ_CP040527           | 1                 | 4681542  | 4681542     |
| I42             | 2015            | China          | <i>Lycium barbarum</i><br>rhizosphere soil | environmental/<br>other | <i>bla</i> <sub>ACT</sub> , <i>catA</i> *, <i>fosA2</i> , <i>oqx</i> <i>B</i>                                                | SAMN11415809   | NZ_CP040606           | 1                 | 4719369  | 4719369     |
| 120152          | 2019            | China          | human blood                                | clinical                | <i>bla</i> <sub>ACT</sub> , <i>catA</i> *, <i>fosA2</i> , <i>oqx</i> <i>B</i>                                                | SAMN19316194   | JAHEUQ000000000       | 27                | 685439   | 4722419     |
| WCHEL090041     | 2016            | China          | human                                      | clinical                | <i>bla</i> <sub>ACT</sub> , <i>catA</i> *, <i>fosA</i> , <i>oqx</i> <i>B</i>                                                 | SAMN09845216   | RXRU000000000         | 38                | 486168   | 4783603     |
| A3203           | n.a.            | USA            | rhizosphere                                | environmental/<br>other | <i>bla</i> <sub>ACT</sub> , <i>catA</i> *, <i>fosA2</i> , <i>oqx</i> <i>B</i>                                                | SAMN05589724   | MSDM000000000         | 17                | 792170   | 4812349     |
| WCHEL090017     | 2017            | China          | human                                      | clinical                | <i>aph</i> (3'')-Ibtype, <i>aph</i> (6)-Id, <i>bla</i> <sub>ACT</sub> , <i>catA</i> *,<br><i>fosA2</i> , <i>oqx</i> <i>B</i> | SAMN09845195   | RXRA000000000         | 87                | 250730   | 5167660     |
| JGM43           | 2015            | USA            | kitchen B                                  | environmental/<br>other | <i>bla</i> <sub>ACT</sub> , <i>catA</i> *, <i>fosA2</i>                                                                      | SAMN17146117   | JAERJF000000000       | 97                | 190941   | 5302774     |
| DSM16688T       | n.a.            | Germany        | n.a.                                       | n.a.                    | <i>bla</i> <sub>ACT</sub> , <i>catA</i> *, <i>fosA</i> , <i>oqx</i> <i>B</i>                                                 | SAMEA104113918 | FYBD000000000         | 26                | 544330   | 4908609     |
| LecVs2          | n.a.            | Italy          | n.a.                                       | n.a.                    | <i>ampC</i> *, <i>oqx</i> <i>B</i> , <i>vat</i> *                                                                            | SAMEA3213012   | CEFR000000000         | 197               | 62320    | 5285925     |
| EnVs2           | n.a.            | Italy          | n.a.                                       | n.a.                    | <i>ampC</i> *, <i>oqx</i> <i>B</i>                                                                                           | SAMEA3213011   | CEFQ000000000         | 108               | 393305   | 5079786     |
| GN02454         | 2005            | USA            | human bodily fluid                         | clinical                | <i>bla</i> <sub>ACT</sub> , <i>catA</i> *, <i>fosA</i> , <i>oqx</i> <i>B</i>                                                 | SAMN03732707   | LEDW000000000         | 22                | 586033   | 4715527     |
| AA4             | 2012            | USA            | <i>Zea mays</i> root                       | environmental/<br>other | <i>bla</i> <sub>ACT</sub> , <i>catA</i> *, <i>fosA</i> , <i>oqx</i> <i>B</i>                                                 | SAMN06130962   | CP018785              | 1                 | 4799256  | 4799256     |
| GN02730         | 2008            | USA            | human                                      | clinical                | <i>bla</i> <sub>ACT</sub> , <i>catA</i> *, <i>fosA2</i> , <i>oqx</i> <i>B</i>                                                | SAMN03732724   | LEER000000000         | 75                | 322082   | 5204500     |
| GN02226         | 2003            | USA            | human bodily fluid                         | clinical                | <i>bla</i> <sub>ACT</sub> , <i>catA</i> *, <i>fosA</i> , <i>oqx</i> <i>B</i>                                                 | SAMN03732688   | LEEO000000000         | 36                | 276882   | 4836923     |
| EnVs6           | n.a.            | Italy          |                                            |                         | <i>ampC</i> *, <i>oqx</i> <i>B</i> , <i>vat</i> *                                                                            | SAMEA3213010   | CEFO000000000         | 64                | 208468   | 5220112     |
| MGYG-HGUT-02503 | n.a.            | Australia      | human gut                                  | clinical                | <i>bla</i> <sub>ACT</sub> , <i>catA</i> *, <i>fosA2</i> , <i>oqx</i> <i>B</i>                                                | SAMEA5852008   | CABMNI000000000       | 26                | 332883   | 4697885     |
| BIDMC121        | n.a.            | USA            | human                                      | clinical                | <i>bla</i> <sub>ACT</sub> , <i>catA</i> *, <i>fosA</i> , <i>oqx</i> <i>B</i>                                                 | SAMN08148284   | JACRRX000000000       | 30                | 284260   | 5224129     |
| EcWSU1          | 2007/2008       | USA            | onion bulbs                                | environmental/<br>other | <i>bla</i> <sub>ACT</sub> , <i>catA</i> *, <i>fosA2</i> , <i>oqx</i> <i>B</i>                                                | SAMN02604307   | CP002886              | 2                 | 4734438  | 4798091     |
| OLC-1682        | 2014            | Canada         | n.a.                                       | food                    | <i>bla</i> <sub>ACT</sub> , <i>catA</i> *, <i>oqx</i> <i>B</i>                                                               | SAMN03292329   | JXWK000000000         | 1341              | 5354     | 4910606     |
| e1617           | 2007            | United Kingdom | human blood                                | clinical                | <i>bla</i> <sub>ACT</sub> , <i>catA</i> *, <i>fosA</i> , <i>oqx</i> <i>B</i>                                                 | SAMEA2273503   | FJZU000000000         | 37                | 229677   | 4784689     |
| e864            | 2004            | United Kingdom | human blood                                | clinical                | <i>bla</i> <sub>ACT</sub> , <i>catA</i> *, <i>fosA</i> , <i>oqx</i> <i>B</i>                                                 | SAMEA2273255   | FKHG000000000         | 36                | 234939   | 4786532     |
| PDC34           | n.a.            | USA            | n.a.                                       | n.a.                    | <i>bla</i> <sub>ACT</sub> , <i>catA</i> *, <i>fosA</i> , <i>oqx</i> <i>B</i>                                                 | SAMN05428986   | FRCI000000000         | 19                | 697266   | 4683223     |
| Hanford         | 2008            | USA            | water Sample                               | environmental/<br>other | <i>bla</i> <sub>ACT</sub> , <i>bla</i> <sub>TEM-116</sub> , <i>catA1</i> , <i>catA</i> *, <i>fosA</i> , <i>oqx</i> <i>B</i>  | SAMN02212350   | ATCK000000000         | 62                | 640760   | 4832153     |
| MGH160          | 2015            | USA            | human                                      | clinical                | <i>bla</i> <sub>ACT</sub> , <i>bla</i> <sub>FONA</sub> , <i>catA</i> *, <i>fosA</i> , <i>oqx</i> <i>B</i>                    | SAMN04521909   | NGRN000000000         | 59                | 233137   | 4925300     |
| DLL7524         | 2015            | Australia      | human feces                                | clinical                | <i>bla</i> <sub>ACT</sub> , <i>catA</i> *, <i>fosA2</i> , <i>oqx</i> <i>B</i>                                                | SAMN08374129   | PQCT000000000         | 26                | 332883   | 4697885     |
| P101            | n.a.            | USA            | switchgrass                                | environmental/<br>other | <i>bla</i> <sub>ACT-12</sub> , <i>catA</i> *, <i>fosA2</i> , <i>oqx</i> <i>B</i>                                             | SAMN02641647   | NZ_CP006580           | 1                 | 5369929  | 5369929     |
| e1026           | 2005            | United Kingdom | human blood                                | clinical                | <i>bla</i> <sub>ACT</sub> , <i>catA</i> *, <i>fosA2</i> , <i>oqx</i> <i>B</i>                                                | SAMEA2273485   | FJWD000000000         | 27                | 494790   | 4725159     |

|                 |      |                |                                                              |                         |                                                                                                               |                |                |     |         |         |
|-----------------|------|----------------|--------------------------------------------------------------|-------------------------|---------------------------------------------------------------------------------------------------------------|----------------|----------------|-----|---------|---------|
| e2350           | 2010 | United Kingdom | human blood                                                  | clinical                | <i>bla</i> <sub>ACT</sub> , <i>bla</i> <sub>NMC-A</sub> , <i>catA</i> *, <i>fosA</i> , <i>oqx</i> <i>B</i>    | SAMEA2273452   | FKCG00000000   | 40  | 491260  | 4963845 |
| EN-119          | n.a. | China          | human                                                        | clinical                | <i>bla</i> <sub>ACT</sub> , <i>catA</i> *, <i>fosA</i> , <i>oqx</i> <i>B</i>                                  | SAMN05787341   | NZ_CP017279    | 2   | 4857439 | 4952770 |
| E8              | 2015 | Germany        | cucumber                                                     | environmental/<br>other | <i>bla</i> <sub>ACT</sub> , <i>catA</i> *, <i>fosA</i> , <i>oqx</i> <i>B</i> , <i>tel</i> (A)-type            | SAMN12560200   | VTUA00000000   | 140 | 496749  | 4848102 |
| NR1491          | 2013 | Japan          | n.a.                                                         | n.a.                    | <i>bla</i> <sub>ACT</sub> -54, <i>bla</i> <sub>NMC-A</sub> , <i>catA</i> *, <i>fosA</i> , <i>oqx</i> <i>B</i> | SAMD00184384   | BKZO00000000   | 32  | 456530  | 4785407 |
| ES-1            | 2015 | USA            | soil                                                         | environmental/<br>other | <i>bla</i> <sub>ACT</sub> , <i>catA</i> *, <i>fosA</i> , <i>oqx</i> <i>B</i>                                  | SAMN11281800   | SZVD00000000   | 95  | 129134  | 4858644 |
| AS012248        | 2015 | USA            | human lung                                                   | clinical                | <i>bla</i> <sub>ACT</sub> , <i>catA</i> *, <i>fosA</i> , <i>oqx</i> <i>B</i>                                  | SAMN12250567   | VLNN00000000   | 739 | 71890   | 5204705 |
| AS012244        | 2015 | USA            | human lung                                                   | clinical                | <i>bla</i> <sub>ACT</sub> , <i>catA</i> *, <i>fosA</i> , <i>oqx</i> <i>B</i>                                  | SAMN12250563   | VLNO00000000   | 548 | 209857  | 4972320 |
| D42-sc-1712201  | n.a. | Switzerland    | n.a.                                                         | n.a.                    | <i>bla</i> <sub>ACT</sub> , <i>catA</i> *, <i>fosA</i> 2, <i>oqx</i> <i>B</i>                                 | SAMN15300311   | NZ_CP056119    | 1   | 4875486 | 4875486 |
| FDAARGOS 1436   | 2004 | Germany        | human mid-stream urine                                       | clinical                | <i>bla</i> <sub>ACT</sub> , <i>fosA</i> , <i>oqx</i> <i>A</i> , <i>oqx</i> <i>B</i>                           | SAMN16357578   | CP077223       | 1   | 4943437 | 4943437 |
| K37             | 2020 | China          | human faeces                                                 | clinical                | <i>bla</i> <sub>ACT</sub> , <i>fosA</i> 2, <i>oqx</i> <i>A</i> , <i>oqx</i> <i>B</i>                          | SAMN14389561   | JAASIR00000000 | 17  | 667499  | 4902033 |
| K32             | 2020 | China          | human faeces                                                 | clinical                | <i>bla</i> <sub>ACT</sub> , <i>fosA</i> 2, <i>oqx</i> <i>A</i> , <i>oqx</i> <i>B</i>                          | SAMN14389555   | JAASIL00000000 | 18  | 721734  | 4736013 |
| K31_2           | 2020 | China          | human faeces                                                 | clinical                | <i>bla</i> <sub>ACT</sub> , <i>fosA</i> 2, <i>oqx</i> <i>A</i> , <i>oqx</i> <i>B</i>                          | SAMN14389554   | JAASIK00000000 | 15  | 721734  | 4736350 |
| FDAARGOS_1475   | 2002 | Greece         | soil from a land farm for treatment of refinery waste sludge | environmental/<br>other | <i>bla</i> <sub>ACT</sub> , <i>fosA</i> 2, <i>oqx</i> <i>A</i> , <i>oqx</i> <i>B</i>                          | SAMN20888892   | CP082860       | 1   | 4730716 | 4730716 |
| FDAARGOS_1498   | 2002 | Greece         | soil from a land farm for treatment of refinery waste sludge | environmental/<br>other | <i>bla</i> <sub>ACT</sub> , <i>catA</i> *, <i>fosA</i> 2, <i>oqx</i> <i>B</i>                                 | SAMN21218854   | CP083640       | 1   | 4730711 | 4730711 |
| UW5             | 1994 | Canada         | soil                                                         | environmental/<br>other | <i>bla</i> <sub>ACT</sub> , <i>catA</i> *, <i>fosA</i> , <i>oqx</i> <i>B</i>                                  | SAMN03743787   | NZ_CP011798    | 1   | 4904981 | 4904981 |
| 2485STDY5438318 | n.a. | United Kingdom | human                                                        | clinical                | <i>bla</i> <sub>ACT</sub> , <i>catA</i> *, <i>fosA</i> , <i>oqx</i> <i>B</i>                                  | SAMEA1964557   | UNVN00000000   | 35  | 539931  | 4810044 |
| 2485STDY5438320 | n.a. | United Kingdom | human                                                        | clinical                | <i>bla</i> <sub>ACT</sub> , <i>catA</i> *, <i>fosA</i> , <i>oqx</i> <i>B</i>                                  | SAMEA2053720   | UNVX00000000   | 23  | 540025  | 4761804 |
| EC57            | 2018 | Japan          | human blood                                                  | clinical                | <i>bla</i> <sub>ACT</sub> , <i>catA</i> *, <i>fosA</i> , <i>oqx</i> <i>B</i>                                  | SAMN16911616   | JADRHX00000000 | 32  | 314090  | 4721280 |
| MML25           | 2018 | Japan          | human blood                                                  | clinical                | <i>bla</i> <sub>ACT</sub> , <i>catA</i> *, <i>fosA</i> 2, <i>oqx</i> <i>B</i>                                 | SAMN16911600   | JADRIN00000000 | 22  | 697873  | 4737023 |
| OLC-1683        | 2014 | Canada         | n.a.                                                         | food                    | <i>fosA</i> 2, <i>oqx</i> <i>B</i> -type                                                                      | SAMN03292330   | JXWL00000000   | 955 | 8888    | 5136359 |
| AOUC-8/14       | 2014 | Italy          | human rectal swab from female                                | clinical                | <i>bla</i> <sub>ACT</sub> , <i>bla</i> <sub>NMC-A</sub> , <i>catA</i> *, <i>fosA</i> 2, <i>oqx</i> <i>B</i>   | SAMN03861996   | LGIV00000000   | 15  | 695071  | 4766022 |
| GN04920         | 2012 | USA            | n.a.                                                         | clinical                | <i>bla</i> <sub>ACT</sub> , <i>catA</i> *, <i>fosA</i> , <i>oqx</i> <i>B</i>                                  | SAMN04572595   | LVTW00000000   | 92  | 82088   | 4924730 |
| NCR3            | 2014 | Australia      | <i>Carpobrotus rossii</i> rhizosphere                        | environmental/<br>other | <i>bla</i> <sub>ACT</sub> , <i>catA</i> *, <i>fosA</i> 2, <i>oqx</i> <i>B</i>                                 | SAMN05462048   | MCGF00000000   | 23  | 771694  | 4779415 |
| 4928STDY7071139 | 2018 | United Kingdom | human faecal                                                 | clinical                | <i>bla</i> <sub>ACT</sub> , <i>catA</i> *, <i>fosA</i> 2, <i>oqx</i> <i>B</i>                                 | SAMEA104567250 | CABGVX00000000 | 48  | 285987  | 5138127 |
| 4928STDY7071138 | 2018 | United Kingdom | human faecal                                                 | clinical                | <i>bla</i> <sub>ACT</sub> , <i>catA</i> *, <i>fosA</i> 2, <i>oqx</i> <i>B</i>                                 | SAMEA104567249 | CABGVW00000000 | 47  | 209911  | 5136800 |
| CEB04           | 2003 | Sweden         | human urinary tract catheters                                | clinical                | <i>bla</i> <sub>ACT</sub> , <i>catA</i> *, <i>fosA</i> , <i>oqx</i> <i>B</i>                                  | SAMN11357407   | NZ_CP039741    | 1   | 4892375 | 4892475 |
| 2021EL-00127    | 2020 | USA            | human urine                                                  | clinical                | <i>bla</i> <sub>ACT</sub> , <i>bla</i> <sub>NMC-A</sub> , <i>catA</i> *, <i>fosA</i> 2, <i>oqx</i> <i>B</i>   | SAMN18511098   | JAGKLL00000000 | 20  | 585339  | 4892341 |
| 2020EL-00108    | 2020 | USA            | human peritoneum                                             | clinical                | <i>bla</i> <sub>ACT</sub> , <i>bla</i> <sub>NMC-A</sub> , <i>catA</i> *, <i>fosA</i> 2, <i>oqx</i> <i>B</i>   | SAMN18511080   | JAGKMD00000000 | 38  | 336354  | 4793318 |
| 4928STDY7071136 | 2018 | United Kingdom | human faecal                                                 | clinical                | <i>bla</i> <sub>ACT</sub> , <i>catA</i> *, <i>fosA</i> 2, <i>oqx</i> <i>B</i>                                 | SAMEA104567247 | CABGVO00000000 | 47  | 286026  | 5137156 |

|                          |      |                |                         |                         |                                                                                                                                                                                                       |                |                 |      |         |         |
|--------------------------|------|----------------|-------------------------|-------------------------|-------------------------------------------------------------------------------------------------------------------------------------------------------------------------------------------------------|----------------|-----------------|------|---------|---------|
| 4928STDY7071140          | 2018 | United Kingdom | human faecal            | clinical                | <i>bla<sub>ACT</sub>, catA*, fosA2, oqxB</i>                                                                                                                                                          | SAMEA104567251 | CABGVZ000000000 | 59   | 209917  | 5061284 |
| I140                     | 2017 | USA            | human hospital patient  | clinical                | <i>bla<sub>ACT-12</sub>, catA*, fosA7, fosA, oqxB</i>                                                                                                                                                 | SAMN15689507   | JACJHJ000000000 | 25   | 542092  | 5039619 |
| Res13-Abat-PEB19-P1-02-A | 2017 | Canada         | swab                    | Environmental/<br>other | <i>bla<sub>ACT-12</sub>, catA*, fosA2, oqxB</i>                                                                                                                                                       | SAMN16304044   | JADAJZ000000000 | 2    | 4656584 | 4661993 |
| MGH216                   | n.a. | USA            | human                   | clinical                | <i>bla<sub>ACT</sub>, catA*, fosA, oqxB</i>                                                                                                                                                           | SAMN08148254   | JACRRJ000000000 | 35   | 252605  | 5225825 |
| 608_ECLO                 | n.a. | USA            | human                   | clinical                | <i>bla<sub>ACT</sub>, catA*, fosA, oqxB</i>                                                                                                                                                           | SAMN03197808   | JVAG000000000   | 222  | 48185   | 4804191 |
| GN03638                  | 2010 | USA            | human                   | clinical                | <i>bla<sub>ACT</sub>, catA*, fosA2, oqxB-type</i>                                                                                                                                                     | SAMN04407776   | LRCI000000000   | 167  | 47667   | 5003459 |
| e558                     | 2003 | United Kingdom | human blood             | clinical                | <i>bla<sub>ACT</sub>, catA*, fosA2, oqxB</i>                                                                                                                                                          | SAMEA2273189   | FKEY000000000   | 62   | 158439  | 5091497 |
| 48                       | 2017 | Germany        | human clinical specimen | clinical                | <i>bla<sub>ACT</sub>, catA*, fosA2</i>                                                                                                                                                                | SAMN12258083   | VKFK000000000   | 200  | 203750  | 5134960 |
| 49                       | 2017 | Germany        | human clinical specimen | clinical                | <i>bla<sub>ACT</sub>, catA*, fosA2</i>                                                                                                                                                                | SAMN12258084   | VKFJ000000000   | 152  | 185970  | 5122530 |
| AS012471                 | 2015 | USA            | human lung              | clinical                | <i>bla<sub>ACT</sub>, catA*, fosA, oqxB</i>                                                                                                                                                           | SAMN12250790   | VLMA000000000   | 754  | 245975  | 5153193 |
| INSAq77                  | 2018 | Portugal       | <i>Sparus aurata</i>    | environmental/<br>other | <i>bla<sub>ACT-88</sub>, catA*, fosA, mcr-9.1, oqxB</i>                                                                                                                                               | SAMN15015462   | JABRPH000000000 | 225  | 74544   | 5276953 |
| EC56                     | 2018 | Japan          | human blood             | clinical                | <i>bla<sub>ACT</sub>, catA*, fosA2, mcr-10.1, oqxB</i>                                                                                                                                                | SAMN16911615   | JADRHJ000000000 | 80   | 202845  | 5110004 |
| EC49                     | 2018 | Japan          | human blood             | clinical                | <i>bla<sub>ACT</sub>, catA*, fosA2, oqxB</i>                                                                                                                                                          | SAMN16911589   | JADRIY000000000 | 68   | 186338  | 4853579 |
| 11894                    | 2011 | China          | human throat swab       | clinical                | <i>bla<sub>ACT</sub>, catA*, fosA, mcr-10, oqxB</i>                                                                                                                                                   | SAMN18435831   | JAGFWU000000000 | 120  | 141921  | 4749540 |
| 40513                    | 2015 | France         | <i>Corvus</i>           | environmental/<br>other | <i>aac(6')-Ib3, aadA2, ant(2'')-Ia, bla<sub>ACT</sub>, bla<sub>CTX-M-9</sub>, bla<sub>SHV-12</sub>, catA1, catA*, fosA2, mcr-9.1, oqxB, qnrA1, sul1, tet(A)</i>                                       | SAMN15925369   | JAGDFR000000000 | 62   | 529698  | 5031188 |
| 40508                    | 2015 | France         | <i>Pica pica</i>        | environmental/<br>other | <i>aac(6')-Ib3, aadA2, ant(2'')-Ia, bla<sub>ACT</sub>, bla<sub>CTX-M-9</sub>, bla<sub>SHV-12</sub>, catA1, catA*, fosA2, mcr-9.1, oqxB, qnrA1, sul1, tet(A)</i>                                       | SAMN15925368   | JAGDFS000000000 | 66   | 423627  | 5031210 |
| Y05                      | 2020 | China          | human faeces            | clinical                | <i>aac(6')-Ib-cr5, aadA16, aph(3'')-Ib, aph(6)-Id, arr-3, bla<sub>ACT</sub>, dfrA27, fosA2, mph(A), oqxA, oqxB, qnrB6, sul1, tet(C)</i>                                                               | SAMN14389599   | JAASKD000000000 | 49   | 281183  | 5549279 |
| Y09                      | 2020 | China          | human faeces            | clinical                | <i>aac(6')-Ib-cr5, aadA2, aph(3'')-Ib, aph(6)-Id, arr-3, bla<sub>ACT</sub>, bla<sub>OXA-1</sub>, catB3, dfrA12, dfrA14, fosA3, fosA, mph(A), oqxA, oqxB, qnrA1, qnrS1, sul1, sul2, tet(B), tet(D)</i> | SAMN14389603   | JAASKH000000000 | 41   | 534659  | 5406832 |
| AS012405                 | 2016 | Austria        | human lung              | clinical                | <i>bla<sub>ACT-12-type</sub>, fosA2-type, oqxA-type, oqxB-type</i>                                                                                                                                    | SAMN12250724   | VLMJ010000000   | 2375 | 182725  | 5650902 |

\* (HMM): According with the NCBI Pathogen Detection (<https://www.ncbi.nlm.nih.gov/pathogens>), using hidden Markov models (HMMs) to identify protein families

n.a.: data not available
