# Supplementary material for: Genomic Analysis of a mcr-9.1-Harbouring IncHI2-ST1 Plasmid from Enterobacter ludwigii Isolated in Fish Farming
Source: MDPI journal article supplement (doi:10.3390/antibiotics11091232), 2022-09-10
Supplement: s1 [file s1]

**Table S1.** Loose best-hit results ( $\geq 65\%$  of identity), by predicted gene, obtained using the Resistance Gene Identifier (RGI).

| Contig      | RGI Criteria | ARO Term | Detection Criteria Model | AMR Gene Family                                                                                                                                                                                                                                    | Drug Class                                                                                                                                     | Resistance Mechanism                                                                | % Identity of Matching Region | % Length of Reference Sequence |
|-------------|--------------|----------|--------------------------|----------------------------------------------------------------------------------------------------------------------------------------------------------------------------------------------------------------------------------------------------|------------------------------------------------------------------------------------------------------------------------------------------------|-------------------------------------------------------------------------------------|-------------------------------|--------------------------------|
| INSAq77p_72 | Loose        | ramA     | protein homolog          | resistance-nodulation-cell division (RND) antibiotic efflux pump; General Bacterial Porin with reduced permeability to beta-lactams                                                                                                                | fluoroquinolone; monobactam; carbapenem; cephalosporin; glycylicycline; cephamycin; penam; tetracycline; rifamycin; phenicol; triclosan; penem | antibiotic efflux; reduced permeability to antibiotic                               | 97.4                          | 91.1                           |
| INSAq77p_3  | Loose        | acrA     | protein homolog          | resistance-nodulation-cell division (RND) antibiotic efflux pump                                                                                                                                                                                   | fluoroquinolone; cephalosporin; glycylicycline; penam; tetracycline; rifamycin; phenicol; triclosan                                            | antibiotic efflux                                                                   | 95.5                          | 100.0                          |
| INSAq77p_87 | Loose        | cpxA     | protein homolog          | resistance-nodulation-cell division (RND) antibiotic efflux pump                                                                                                                                                                                   | aminoglycoside; aminocoumarin                                                                                                                  | antibiotic efflux                                                                   | 94.8                          | 100.0                          |
| INSAq77p_44 | Loose        | bacA     | protein homolog          | undecaprenyl pyrophosphate related proteins                                                                                                                                                                                                        | peptide                                                                                                                                        | antibiotic target alteration                                                        | 94.1                          | 100.0                          |
| INSAq77p_42 | Loose        | soxR     | protein overexpression   | ATP-binding cassette (ABC) antibiotic efflux pump; major facilitator superfamily (MFS) antibiotic efflux pump; resistance-nodulation-cell division (RND) antibiotic efflux pump                                                                    | fluoroquinolone; cephalosporin; glycylicycline; penam; tetracycline; rifamycin; phenicol; triclosan                                            | antibiotic target alteration; antibiotic efflux                                     | 93.4                          | 98.7                           |
| INSAq77p_2  | Loose        | acrB     | protein homolog          | resistance-nodulation-cell division (RND) antibiotic efflux pump                                                                                                                                                                                   | fluoroquinolone; cephalosporin; glycylicycline; penam; tetracycline; rifamycin; phenicol; triclosan                                            | antibiotic efflux                                                                   | 92.9                          | 99.9                           |
| INSAq77p_3  | Loose        | mdtC     | protein homolog          | resistance-nodulation-cell division (RND) antibiotic efflux pump                                                                                                                                                                                   | aminocoumarin                                                                                                                                  | antibiotic efflux                                                                   | 91.4                          | 100.0                          |
| INSAq77p_18 | Loose        | YojI     | protein homolog          | ATP-binding cassette (ABC) antibiotic efflux pump                                                                                                                                                                                                  | peptide                                                                                                                                        | antibiotic efflux                                                                   | 90.1                          | 100.0                          |
| INSAq77p_2  | Loose        | mdtB     | protein homolog          | resistance-nodulation-cell division (RND) antibiotic efflux pump                                                                                                                                                                                   | aminocoumarin                                                                                                                                  | antibiotic efflux                                                                   | 90.0                          | 100.0                          |
| INSAq77p_41 | Loose        | soxS     | protein overexpression   | ATP-binding cassette (ABC) antibiotic efflux pump; major facilitator superfamily (MFS) antibiotic efflux pump; resistance-nodulation-cell division (RND) antibiotic efflux pump; General Bacterial Porin with reduced permeability to beta-lactams | fluoroquinolone; monobactam; carbapenem; cephalosporin; glycylicycline; cephamycin; penam; tetracycline; rifamycin; phenicol; triclosan; penem | antibiotic target alteration; antibiotic efflux; reduced permeability to antibiotic | 89.7                          | 100.9                          |
| INSAq77p_6  | Loose        | KpnG     | protein homolog          | major facilitator superfamily (MFS) antibiotic efflux pump                                                                                                                                                                                         | macrolide; fluoroquinolone; aminoglycoside; carbapenem; cephalosporin; penam; peptide; penem                                                   | antibiotic efflux                                                                   | 87.4                          | 100.0                          |
| INSAq77p_3  | Loose        | mdtG     | protein homolog          | major facilitator superfamily (MFS) antibiotic efflux pump                                                                                                                                                                                         | fosfomycin                                                                                                                                     | antibiotic efflux                                                                   | 86.7                          | 100.3                          |
| INSAq77p_83 | Loose        | mdfA     | protein homolog          | major facilitator superfamily (MFS) antibiotic efflux pump                                                                                                                                                                                         | tetracycline; benzalkonium chloride; rhodamine                                                                                                 | antibiotic efflux                                                                   | 86.2                          | 114.4                          |
| INSAq77p_5  | Loose        | baeS     | protein homolog          | resistance-nodulation-cell division (RND) antibiotic efflux pump                                                                                                                                                                                   | aminoglycoside; aminocoumarin                                                                                                                  | antibiotic efflux                                                                   | 86.1                          | 100.0                          |
| INSAq77p_20 | Loose        | OmpA     | protein homolog          | General Bacterial Porin with reduced permeability to beta-lactams                                                                                                                                                                                  | monobactam; carbapenem; cephalosporin; cephamycin; penam; penem                                                                                | reduced permeability to antibiotic                                                  | 86.0                          | 93.9                           |

| Contig       | RGI Criteria | ARO Term | Detection Criteria Model | AMR Gene Family                                                                                                                                                                 | Drug Class                                                                                                                                                                            | Resistance Mechanism                            | % Identity of Matching Region | % Length of Reference Sequence |
|--------------|--------------|----------|--------------------------|---------------------------------------------------------------------------------------------------------------------------------------------------------------------------------|---------------------------------------------------------------------------------------------------------------------------------------------------------------------------------------|-------------------------------------------------|-------------------------------|--------------------------------|
| INSAq77p_6   | Loose        | MdtK     | protein homolog          | multidrug and toxic compound extrusion (MATE) transporter                                                                                                                       | fluoroquinolone                                                                                                                                                                       | antibiotic efflux                               | 85.8                          | 101.3                          |
| INSAq77p_13  | Loose        | mdtH     | protein homolog          | major facilitator superfamily (MFS) antibiotic efflux pump                                                                                                                      | fluoroquinolone                                                                                                                                                                       | antibiotic efflux                               | 85.1                          | 100.0                          |
| INSAq77p_32  | Loose        | TolC     | protein homolog          | ATP-binding cassette (ABC) antibiotic efflux pump; major facilitator superfamily (MFS) antibiotic efflux pump; resistance-nodulation-cell division (RND) antibiotic efflux pump | macrolide; fluoroquinolone; aminoglycoside; carbapenem; cephalosporin; glycyclcycline; cephamycin; penam; tetracycline; peptide; aminocoumarin; rifamycin; phenicol; triclosan; penem | antibiotic efflux                               | 84.9                          | 99.4                           |
| INSAq77p_188 | Loose        | PmrF     | protein homolog          | pmr phosphoethanolamine transferase                                                                                                                                             | peptide                                                                                                                                                                               | antibiotic target alteration                    | 84.8                          | 101.6                          |
| INSAq77p_118 | Loose        | kdpE     | protein homolog          | kdpDE                                                                                                                                                                           | aminoglycoside                                                                                                                                                                        | antibiotic efflux                               | 84.4                          | 100.0                          |
| INSAq77p_46  | Loose        | AcrF     | protein homolog          | resistance-nodulation-cell division (RND) antibiotic efflux pump                                                                                                                | fluoroquinolone; cephalosporin; cephamycin; penam                                                                                                                                     | antibiotic efflux                               | 84.0                          | 100.3                          |
| INSAq77p_18  | Loose        | ugd      | protein homolog          | pmr phosphoethanolamine transferase                                                                                                                                             | peptide                                                                                                                                                                               | antibiotic target alteration                    | 83.5                          | 100.0                          |
| INSAq77p_1   | Loose        | mdtA     | protein homolog          | resistance-nodulation-cell division (RND) antibiotic efflux pump                                                                                                                | aminocoumarin                                                                                                                                                                         | antibiotic efflux                               | 81.2                          | 96.9                           |
| INSAq77p_21  | Loose        | OmpK37   | protein homolog          | General Bacterial Porin with reduced permeability to beta-lactams                                                                                                               | monobactam; carbapenem; cephalosporin; cephamycin; penam; penem                                                                                                                       | reduced permeability to antibiotic              | 80.6                          | 98.7                           |
| INSAq77p_4   | Loose        | acrR     | protein overexpression   | resistance-nodulation-cell division (RND) antibiotic efflux pump                                                                                                                | fluoroquinolone; cephalosporin; glycyclcycline; penam; tetracycline; rifamycin; phenicol; triclosan                                                                                   | antibiotic target alteration; antibiotic efflux | 79.8                          | 100.9                          |
| INSAq77p_61  | Loose        | LptD     | protein homolog          | ATP-binding cassette (ABC) antibiotic efflux pump                                                                                                                               | carbapenem; peptide; aminocoumarin; rifamycin                                                                                                                                         | antibiotic efflux                               | 79.6                          | 100.1                          |
| INSAq77p_45  | Loose        | AcrE     | protein homolog          | resistance-nodulation-cell division (RND) antibiotic efflux pump                                                                                                                | fluoroquinolone; cephalosporin; cephamycin; penam                                                                                                                                     | antibiotic efflux                               | 74.7                          | 98.4                           |
| INSAq77p_17  | Loose        | rosB     | protein homolog          | major facilitator superfamily (MFS) antibiotic efflux pump                                                                                                                      | peptide                                                                                                                                                                               | antibiotic efflux                               | 74.0                          | 99.1                           |
| INSAq77p_17  | Loose        | sdiA     | protein homolog          | resistance-nodulation-cell division (RND) antibiotic efflux pump                                                                                                                | fluoroquinolone; cephalosporin; glycyclcycline; penam; tetracycline; rifamycin; phenicol; triclosan                                                                                   | antibiotic efflux                               | 73.3                          | 100.0                          |
| INSAq77p_153 | Loose        | eptB     | protein homolog          | pmr phosphoethanolamine transferase                                                                                                                                             | peptide                                                                                                                                                                               | antibiotic target alteration                    | 73.2                          | 98.3                           |
| INSAq77p_18  | Loose        | rosA     | protein homolog          | major facilitator superfamily (MFS) antibiotic efflux pump                                                                                                                      | peptide                                                                                                                                                                               | antibiotic efflux                               | 71.8                          | 98.1                           |
| INSAq77p_185 | Loose        | ArnT     | protein homolog          | pmr phosphoethanolamine transferase                                                                                                                                             | peptide                                                                                                                                                                               | antibiotic target alteration                    | 70.2                          | 100.0                          |
| INSAq77p_187 | Loose        | arnA     | protein homolog          | pmr phosphoethanolamine transferase                                                                                                                                             | peptide                                                                                                                                                                               | antibiotic target alteration                    | 69.7                          | 99.7                           |

| Contig      | RGI Criteria | ARO Term | Detection Criteria Model | AMR Gene Family                                                   | Drug Class                                                      | Resistance Mechanism               | % Identity of Matching Region | % Length of Reference Sequence |
|-------------|--------------|----------|--------------------------|-------------------------------------------------------------------|-----------------------------------------------------------------|------------------------------------|-------------------------------|--------------------------------|
| INSAq77p_1  | Loose        | OmpK37   | protein homolog          | General Bacterial Porin with reduced permeability to beta-lactams | monobactam; carbapenem; cephalosporin; cephamycin; penam; penem | reduced permeability to antibiotic | 68.1                          | 18.7                           |
| INSAq77p_19 | Loose        | catA4    | protein homolog          | chloramphenicol acetyltransferase (CAT)                           | phenicol                                                        | antibiotic inactivation            | 65.9                          | 106.9                          |
| INSAq77p_22 | Loose        | OmpK37   | protein homolog          | General Bacterial Porin with reduced permeability to beta-lactams | monobactam; carbapenem; cephalosporin; cephamycin; penam; penem | reduced permeability to antibiotic | 65.7                          | 106.2                          |
